# Supplementary material for: The phenotypic spectrum of terminal 6q deletions based on a large cohort derived from social media and literature: a prominent role for DLL1
Source: bioRxiv or medRxiv preprint supplement (doi:10.1101/2022.11.08.22282043), 2022-11-14
Supplement: Supplementary file [file media-1.pdf]

## **Supplementary files**

The phenotypic spectrum of terminal 6q deletions based on a large cohort derived from social media and literature: a prominent role for *DLL1*

Aafke Engwerda, Wilhelmina S. Kerstjens-Frederikse, Nicole Corsten-Janssen, Trijnie Dijkhuizen and Conny M. A. van Ravenswaaij-Arts

## **Supplementary Figures**

Figure S1. Developmental delay in children older than 2 years of age

Figure S2. Delayed Myelination

Figure S3. Dental problems

## **Supplementary Table**

Table S1. HI and pLI scores

**Figure S1. Developmental delay in children older than 2 years of age**

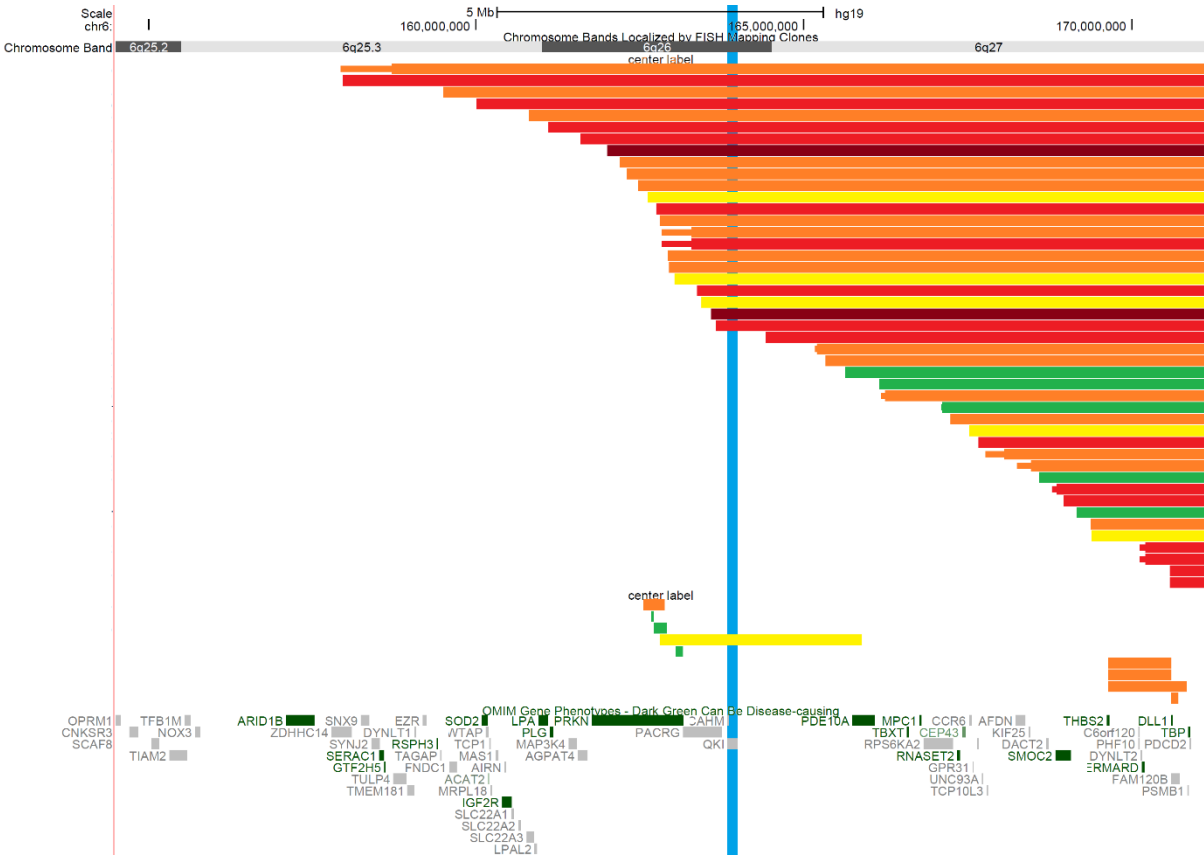

The deletion in each patient for whom development could be categorised is represented by a horizontal bar. Development is categorised as normal (IQ >85, green bar), borderline (IQ 70-85, yellow), mild (IQ 50-70, orange), moderate (IQ 30-50, red) or severe (IQ <30, dark red) delay. The gene *QKI* is represented by a vertical blue bar (see manuscript Discussion).

**Figure S2. Delayed Myelination**

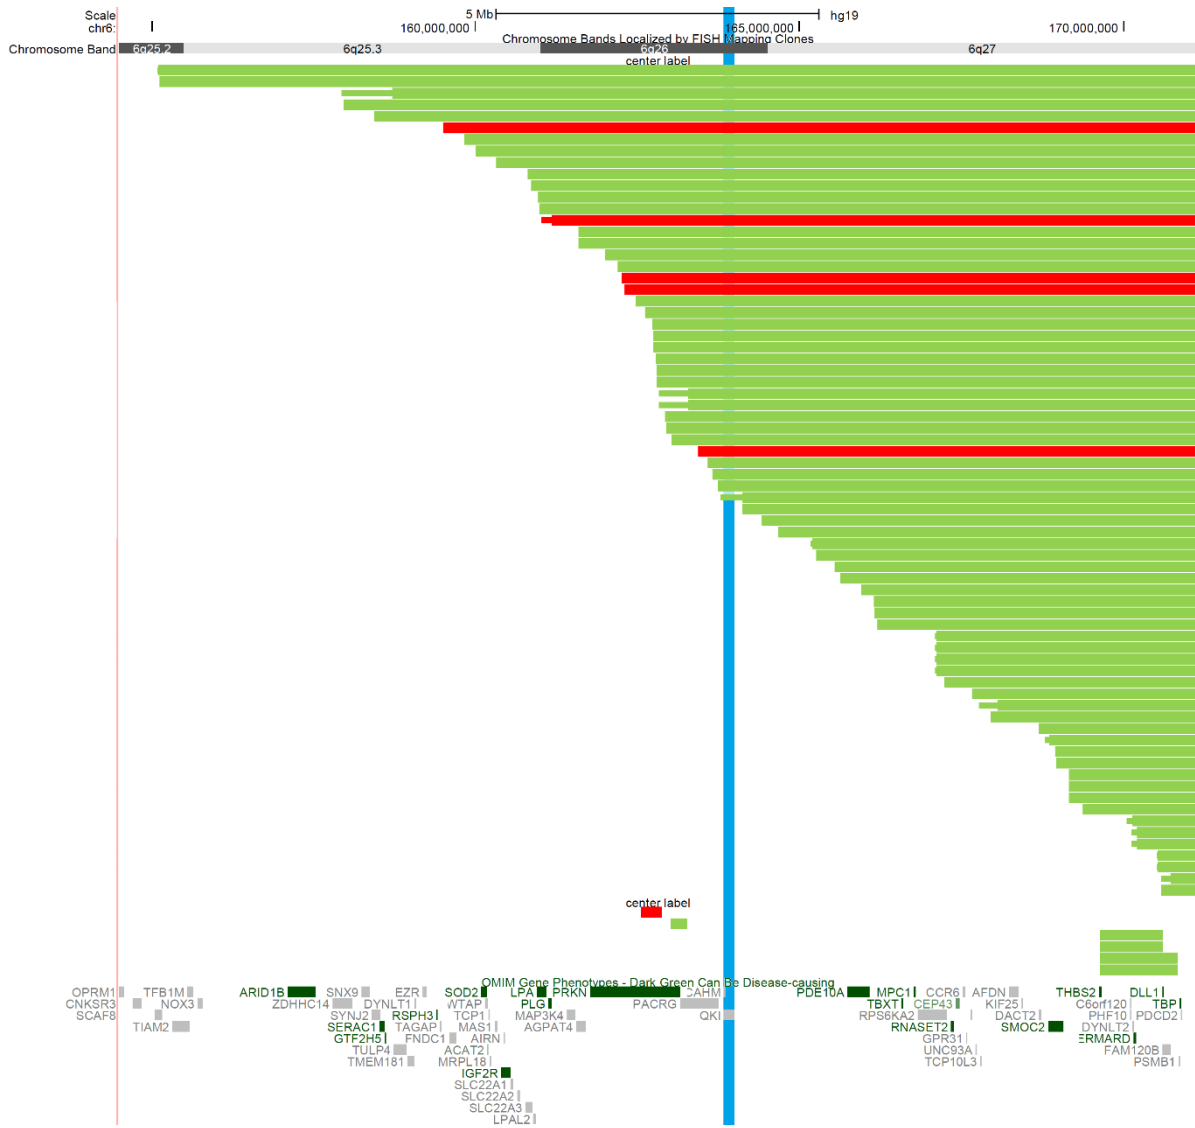

The deletion in each patient for whom delayed myelination was present (red) or absent (green) is represented by a horizontal bar. The gene *QKI* is represented by a vertical blue bar (see manuscript Discussion).

**Figure S3. Dental problems**

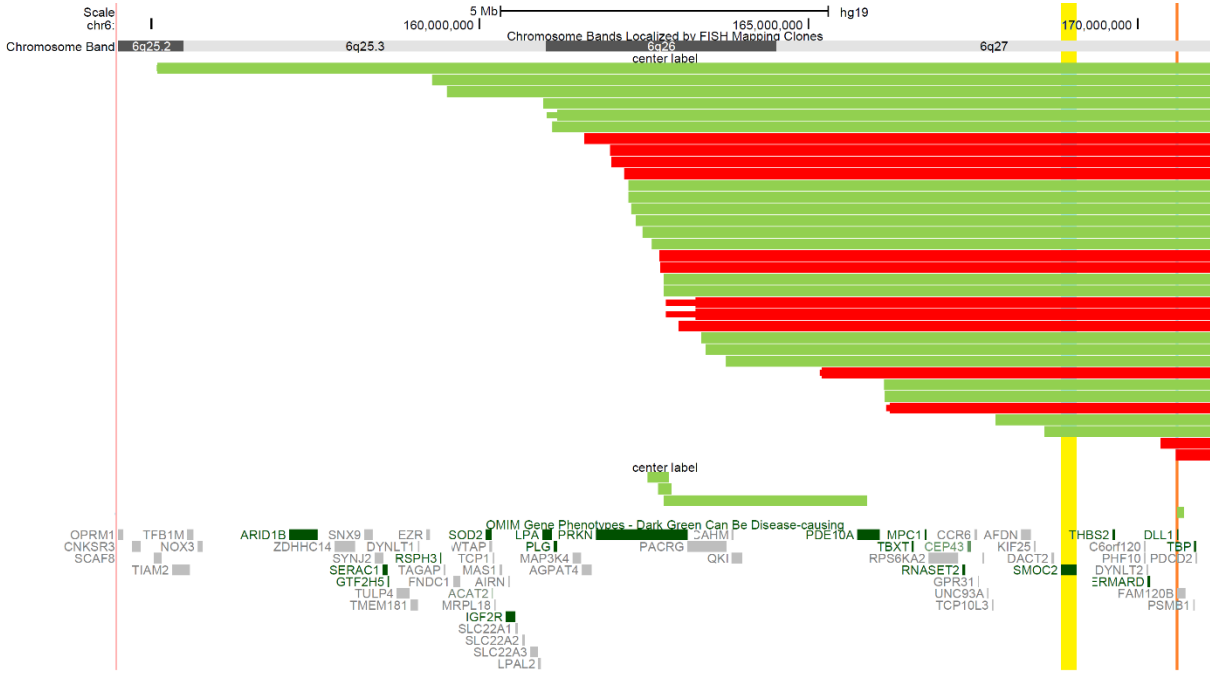

The deletion in each patient for whom dental problems were present (red) or absent (green) is represented by a horizontal bar. The gene *SMOC2* is represented by a vertical yellow bar and the gene *DLL1* is represented by a vertical orange bar. *SMOC2* is related to dental abnormalities in pathogenic homozygous variants (see manuscript Results and Discussion).

**Table S1. HI and pLI scores**

| Location             | Gene                    | MIM*              | % HI   | pLI  |      |
|----------------------|-------------------------|-------------------|--------|------|------|
| 6q27                 | <i>PDCD2</i>            | 600866            | 69.48  | 0.00 |      |
|                      | <b><i>TBP</i></b>       | 600075            | 6.48   | 0.02 |      |
|                      | <b><i>PSMB1</i></b>     | 602017            | 33.38  | 0.97 |      |
|                      | <i>FAM120B</i>          | 612266            | 80.03  | 0.00 |      |
|                      | <b><i>DLL1</i></b>      | 606582            | 4.65   | 1.00 |      |
|                      | <i>ERMARD (C6orf70)</i> | 615532            | 84.86  | 0.00 |      |
|                      | <i>DYNLT2</i>           | 186977            | -      | 0.00 |      |
|                      | <i>PHF10</i>            | 613069            | 18.13  | 0.00 |      |
|                      | <i>C6orf120</i>         | 616987            | 92.18  | -    |      |
|                      | <i>THBS2</i>            | 188061            | 59.96  | 0.56 |      |
|                      | <i>SMOC2</i>            | 607223            | 55.41  | 0.00 |      |
|                      | <i>DACT2</i>            | 608966            | 93.50  | 0.01 |      |
|                      | <i>KIF25</i>            | 603815            | 95.70  | 0.00 |      |
|                      | <b><i>AFDN</i></b>      | 159559            | -      | 1.00 |      |
|                      | <i>TCP10L3</i>          | 187020            | -      | 0.00 |      |
|                      | <i>UNC93A</i>           | 607995            | 85.97  | 0.00 |      |
|                      | <i>GPR31</i>            | 602043            | 91.50  | 0.02 |      |
|                      | <i>CCR6</i>             | 601835            | 84.13  | 0.01 |      |
|                      | <i>CEP43</i>            | 605392            | -      | 0.00 |      |
|                      | <i>RNASET2</i>          | 612944            | 88.27  | 0.00 |      |
|                      | <i>RPS6KA2</i>          | 601685            | 64.44  | 0.02 |      |
|                      | <i>MPC1</i>             | 614738            | 49.44  | 0.04 |      |
|                      | <i>TBXT</i>             | 601397            | -      | 0.06 |      |
|                      | <b><i>PDE10A</i></b>    | 610652            | 52.14  | 1.00 |      |
|                      | 6q26                    | <b><i>QKI</i></b> | 609590 | 4.10 | 0.75 |
|                      |                         | <i>CAHM</i>       | 615930 | -    | -    |
| <i>PACRG</i>         |                         | 608427            | 10.61  | 0.00 |      |
| <b><i>PRKN</i></b>   |                         | 602544            | 0.77   | 0.00 |      |
| <i>AGPAT4</i>        |                         | 614795            | 61.98  | 0.10 |      |
| <b><i>MAP3K4</i></b> |                         | 602425            | 59.19  | 1.00 |      |
| <i>PLG</i>           |                         | 173350            | 40.11  | 0.01 |      |
| <i>LPA</i>           |                         | 152200            | 78.22  | 0.00 |      |
| 6q25.3               | <i>LPAL2</i>            | 611682            | -      | -    |      |
|                      | <i>SLC22A3</i>          | 604842            | 49.06  | 0.00 |      |
|                      | <i>SLC22A2</i>          | 602608            | 63.53  | 0.00 |      |
|                      | <i>SLC22A1</i>          | 602607            | 75.70  | 0.00 |      |
|                      | <i>AIRN</i>             | 604893            | -      | -    |      |
|                      | <b><i>IGF2R</i></b>     | 147280            | 53.96  | 1.00 |      |
|                      | <i>MAS1</i>             | 165180            | 28.09  | 0.00 |      |
|                      | <i>MRPL18</i>           | 611831            | 49.78  | 0.00 |      |
|                      | <b><i>TCPI1</i></b>     | 186980            | 5.10   | 1.00 |      |
|                      | <i>ACAT2</i>            | 100678            | 53.11  | 0.00 |      |
|                      | <b><i>WTAP</i></b>      | 605442            | 6.76   | 1.00 |      |
|                      | <b><i>SOD2</i></b>      | 147460            | 0.99   | 0.15 |      |
|                      | <i>FNDC1</i>            | 609991            | 75.28  | 0.00 |      |
|                      | <i>TAGAP</i>            | 609667            | 82.32  | 0.85 |      |

|        |                      |        |       |      |
|--------|----------------------|--------|-------|------|
|        | <i>RSPH3</i>         | 615876 | 86.62 | 0.00 |
|        | <b><i>EZR</i></b>    | 123900 | 8.64  | 0.18 |
|        | <i>DYNLT1</i>        | 601554 | 66.63 | 0.00 |
|        | <i>TMEM181</i>       | 613209 | 67.29 | 0.01 |
|        | <i>GTF2H5</i>        | 608780 | 30.21 | 0.05 |
|        | <i>SERAC1</i>        | 614725 | 61.19 | 0.00 |
|        | <i>SYNJ2</i>         | 609410 | 63.42 | 0.00 |
|        | <i>SNX9</i>          | 605952 | 40.36 | 0.71 |
|        | <i>ZDHHC14</i>       | 619295 | 29.53 | 0.72 |
|        | <b><i>ARID1B</i></b> | 614556 | 14.17 | 1.00 |
|        | <i>NOX3</i>          | 607105 | 38.77 | 0.00 |
|        | <i>TFB1M</i>         | 607033 | 53.74 | 0.00 |
| 6q25.2 | <i>TIAM2</i>         | 604709 | 53.43 | 0.68 |
|        | <b><i>SCAF8</i></b>  | 616024 | 25.56 | 1.00 |

All OMIM genes studied, extending from 6q27 to 6q25.2 (16 Mb). Predicted HI-genes are highlighted in bold. The HI and pLI scores were derived from <https://decipher.sanger.ac.uk> in May 2021
